# Supplementary material for: Pharmacokinetics, Pharmacodynamics, and Safety of Luseogliflozin in Japanese Patients with Type 2 Diabetes Mellitus: A Randomized, Single-blind, Placebo-controlled Trial
Source: PubMed Central journal article supplement — Adv Ther. 2015 Apr 9;32(4):319–40. doi: 10.1007/s12325-015-0200-x (PMC4415995; doi:10.1007/s12325-015-0200-x), 2015-04-09
Supplement: 12325_2015_200_MOESM1_ESM.pdf [file 12325_2015_200_MOESM1_ESM.pdf]

- This 7-day, randomized, placebo-controlled, single-blind, parallel-group, multiple-dose study, including 40 Japanese patients with T2DM, was conducted at the P-One Clinic (Keikokai Medical Corporation, Tokyo, Japan) between August and November of 2009.
- Luseogliflozin plasma concentrations were dose-proportional, without accumulation.
- Once-daily administration of 0.5-5 mg luseogliflozin increased 24-h urinary glucose excretion in a dose-dependent manner and decreased plasma glucose concentrations.
- On Day 7, the areas under the concentration-time curves for post-meal plasma glucose and the mean plasma glucose for 0-16 h were significantly lower in all luseogliflozin groups versus placebo.
- Luseogliflozin was well tolerated, and the incidence of adverse events was low and seemed unrelated to the dose given.

This summary slide represents the opinions of the authors. Sponsorship for this study was funded by Taisho Pharmaceutical Co., Ltd. Editorial assistance was provided by Nicholas D. Smith, PhD and Keyra Martinez Dunn, PhD of Edanz Group Ltd. For a full list of acknowledgments and conflicts of interest for all authors of this article, please see the full text online. Copyright © The Authors 2015. Creative Commons Attribution Noncommercial License (CC BY-NC).
